1

2                   **AMP-activated protein kinase protects against anoxia**  
3                   **in *Drosophila melanogaster***

4

5

Justin J. Evans, Chengfeng Xiao, and R. Meldrum Robertson

6

7

Department of Biology, Queen's University, Kingston, ON, Canada

8

9

Corresponding author: RMR

10

Email: [robertrm@queensu.ca](mailto:robertrm@queensu.ca)

11

Key Words: invertebrate, insect, locomotion, AMPK, metformin, AICAR, starvation, CNS,

12

spreading depression, glia

13  
14  
15  
16  
17  
18  
19  
20  
21  
22  
23  
24  
25  
26  
27  
28  
29  
30  
31  
32  
33  
34  
35  
36  
37  
38  
39  
40  
41  
42  
43  
44  
45  
46  
47  
48  
49  
50  
51

## Abstract

During anoxia, proper energy maintenance is essential in order to maintain neural operation. Starvation activates AMP-activated protein kinase (AMPK), an evolutionarily conserved indicator of cellular energy status, in a cascade which modulates ATP production and consumption. We investigated the role of energetic status on anoxia tolerance in *Drosophila* and discovered that starvation or AMPK activation increases the speed of locomotor recovery from an anoxic coma. Using temporal and spatial genetic targeting we found that AMPK in the fat body contributes to starvation-induced fast locomotor recovery, whereas, under fed conditions, disrupting AMPK in oenocytes prolongs recovery. By evaluating spreading depolarization in the fly brain during anoxia we show that AMPK activation reduces the severity of ionic disruption and prolongs recovery of electrical activity. Further genetic targeting indicates that glial, but not neuronal, AMPK affects locomotor recovery. Together, these findings support a model in which AMPK is neuroprotective in *Drosophila*.

## Introduction

Optimal neural function requires an uninterrupted supply of energy. Prolonged disruption of this supply can induce neuronal damage, whereas short periods can be tolerated and some organisms are more tolerant by virtue of adaptive mechanisms of metabolic suppression (Staples and Buck, 2009). *Drosophila* survive anoxic conditions, which induce severe energetic depletion, by entering a reversible coma (Lighton and Schilman, 2007; Benasayag-Meszaros et al., 2015). The coma is generated by anoxic depolarization in the brain (Armstrong et al., 2011) which is a form of spreading depolarization (SD), a loss of CNS ion gradients common to insects and mammals (Spong et al., 2016a) and associated with several important brain pathologies (Dreier and Reiffurth, 2015). During this coma, survival depends on the down-regulation of energy turnover and up-regulation of ATP-producing pathways (Hochachka et al., 1996). An enzyme known to play a role in coordinating energy allocation is the metabolic sensing protein, adenosine monophosphate-activated protein kinase (AMPK). In insect preparations AMPK activation mimics hypoxia and starvation by reducing neuronal excitability (Money et al., 2014) and exacerbating ouabain-induced SD (Rodgers-Garlick et al., 2011). Activation of AMPK contributes to mechanisms for coping with hypoxia by metabolic suppression in non-mammalian vertebrates, such as fish (Jibb and Richards, 2008; Zhu et al., 2013). AMPK has diverse roles in different mammalian tissues (Mantovani and Roy, 2011) but, in spite of much research on the role of AMPK in neural damage after oxygen limitation associated with stroke (Manwani and McCullough, 2013) there is little knowledge of its potential role in modulating induction and recovery from SD.

52 AMPK is a heterotrimeric protein consisting of a catalytic alpha ( $\alpha$ ) subunit, regulatory gamma  
53 ( $\gamma$ ), and scaffolding beta subunit ( $\beta$ ). Allosteric activation by AMP leads to the phosphorylation  
54 of the  $\alpha$  subunit on a threonine residue (Thr-172) (Hawley et al., 1995). A rise in AMP, via the  
55 adenylation kinase reaction, occurs when ATP is depleted. Since AMP:ATP varies as a square of  
56 ADP:ATP, the AMPK cascade is a sensitive indicator of cellular energy change (Hardie et al.,  
57 1998). Once activated, AMPK inactivates the ATP-consuming anabolic pathways: fatty acid  
58 synthesis via phosphorylation of acetyl-CoA carboxylate and sterol synthesis via  
59 phosphorylation of 3-hydroxy-3-methylglutaryl-CoA reductase (Hardie et al., 1999). As a result,  
60 depression of acetyl-CoA carboxylate activates catabolic ATP-production via a reduction in  
61 malonyl-CoA concentration. Low concentration of malonyl-CoA reduces inhibition of carnitine  
62 palmitoyltransferase I (CPT-I), leading to an influx of fatty acid substrate (Guzman and  
63 Blazquez, 2004). Surplus fatty acid is converted into ketone bodies to be used as a source of  
64 alternative cellular energy during dietary restriction or prolonged starvation (Murray et al.,  
65 2016).

66  
67 Mechanisms of metabolic regulation during dietary restriction are highly conserved. In  
68 mammals, dietary restriction leads to the accumulation of lipids in the liver, which are later  
69 oxidized to become ketone bodies. While ketone bodies are mainly synthesized and supplied by  
70 the liver, studies suggest glia exhibits hepatic-like ketogenic machinery (Blazquez et al., 1998).  
71 Dietary restriction, or 'ketogenic diets,' can protect the brain from oxidative stress in mammals as  
72 well as in *Drosophila* (Suzuki et al., 2001; Vigne et al., 2009; Gibson et al., 2012). In  
73 *Drosophila*, the oenocytes and fat body have metabolically similar liver-like functions (Gutierrez  
74 et al., 2007). Similarly, dietary restriction increases lipid accumulation in oenocytes and is  
75 associated with heightened levels of ketone bodies in the brain (Johnson et al., 2010; Schulz et  
76 al., 2015). While AMPK is activated in periods of dietary restriction (Slack et al., 2012), the role  
77 of AMPK in these tissues during anoxic stress is still unknown.

78  
79 Here we show that AMPK modulates recovery from anoxic comas in *Drosophila*. This process  
80 involves the return of ion homeostasis in the brain followed by recovery of neural circuit  
81 function upon return to normoxia. We found that pharmacological AMPK activation mimics the  
82 effects of dietary restriction in regulating anoxic recovery and demonstrated using genetic  
83 manipulations that AMPK function in glia, rather than neurons, is important for recovery of  
84 locomotor circuits from SD. In addition, AMPK activity in tissues that drive metabolism  
85 (oenocytes, fat body, and glia) is central to recovery from anoxia. Our results are consistent with  
86 models that suggest AMPK mediates the supply of alternative neural energy and support the  
87 conclusion that the AMPK cascade is neuroprotective in *Drosophila*.

88  
89

## 90 **Material & Methods**

91

### 92 *Drosophila culture*

93 All control lines were maintained on standard agar medium (SAM): 0.01 % molasses, 8.20 %  
94 cornmeal, 3.40 % killed yeast, 0.94 % agar, 0.18 % benzoic acid, 0.66 % propionic acid and  
95 86.61 % water at room temperature ( $25 \pm 0.25$  °C) and 60-70 % relative humidity. Emerging  
96 flies were collected over a 48 hour period using nitrogen (N<sub>2</sub>) anesthesia and transferred to new  
97 food vials. All vials were maintained at equal densities (approx. 20 flies). Experiments were  
98 performed on male flies aged 5-9 days after eclosion. Flies were given a minimum of three days  
99 without N<sub>2</sub> exposure before experimentation to mitigate acute tolerance to anoxia.

100

### 101 *Fly strains*

102 *w<sup>1118</sup>* flies were used as control. Tissue specific manipulation of AMPK was achieved using the  
103 Gal4/UAS system. The UAS lines used to upregulate, UAS-Cherry-AMPK $\alpha$  (#51871), and  
104 downregulate, UAS-AMPK $\alpha$ -RNAi (#25931), AMPK have been previously described (Swick et  
105 al., 2013; Li et al., 2016).

106

107 GAL4 enhancer-trap strains with broad tissue expression included the pan-neuronal (*Elav* #8765)  
108 and pan-glial (*Repo* #7415) lines. Specific glial expression lines included surface glia  
109 (subperineural: *NP2276*) and neuropil glia (astrocyte: *Alrm II*, *Alrm III*, *NP1243*; ensheathing:  
110 *mz0709*, *NP6520*) (see (Awasaki et al., 2008) for a detailed review). Transgene controls were  
111 backcrossed to the *w<sup>1118</sup>* background.

112

113 Expression patterns of mifepristone (RU486) steroid-activated Gal4 lines used are:  
114 P[Switch2]GSG3448 in fat body, oenocytes, and tracheal cells; P[Switch2]GSG10751 in fat  
115 body; P[Switch2]GSGB9-1 in oenocytes. All GSG lines were generated and described by  
116 Nicholson *et al.* (2008), with expression patterns shown in supplemental data  
117 ([http://flystocks.bio.indiana.edu/Browse/gal4/gal4\\_switch.php](http://flystocks.bio.indiana.edu/Browse/gal4/gal4_switch.php)).

118

119 All lines were obtained from the Bloomington Stock center (Bloomington, IN).

120

### 121 *Treatments*

#### 122 (A) Starvation

123 In preliminary experiments, flies exhibited optimal survival and anoxic tolerance after 24 hrs of  
124 starvation; *w<sup>1118</sup>* flies were tested at 12, 24, 36 hours and during a survival assay (data not  
125 shown). Under starvation conditions, flies were transferred 24 hours before testing into vials  
126 containing water-soaked filter paper. The vials were rehydrated 12 hours into starvation to  
127 mitigate desiccation effects.

128

129

130 (B) Pharmacology

131 Metformin (1- $\beta$ -dimethylbiguanide hydrochloride; Sigma-Aldrich) was added directly into  
132 heated standard agar medium, to make a 100 mM concentration, and allowed to settle for 24  
133 hours before testing. AICAR (5-aminoimidazole-4-carboxamide-1- $\beta$ -D-ribose-furanoside;  
134 TOCRIS) was dissolved into 1% dimethylsulfoxide (DMSO) to make a 100 mM aqueous stock.  
135 Approximately 250  $\mu$ l aliquots, from the stock, were layered on the standard agar medium and  
136 allowed to absorb for 24 hours before testing (Vigne et al., 2009). Controls were layered with  
137 250  $\mu$ l of 1% DMSO. Flies were fed AICAR or metformin for four days prior to testing.

138

139 (C) Gene-Switch System

140 Gene-Switch flies were fed RU486 (mifepristone; Sigma-Aldrich) based on optimal time and  
141 dose-dependent transcriptional activation reported (Osterwalder et al., 2001). RU486 was mixed  
142 into heated standard agar medium (10  $\mu$ g/mL) and allowed to settle for 24 hours before testing.  
143 Gene-Switch flies under non-starvation conditions were placed on either standard agar medium  
144 or standard agar medium with RU486 for two or four days prior to testing. Gene-Switch flies  
145 under starvation conditions were fed standard agar medium for at least four days and then  
146 transferred 24 hours before testing into vials containing either non-nutritive agar or non-nutritive  
147 agar with RU486 (10  $\mu$ g/mL).

148

149 *Locomotor Assay*

150 A high-throughput locomotor assay (Xiao and Robertson, 2015) was used to evaluate changes in  
151 activity level before and after anoxia. Flies were loaded into circular chambers (1.27 cm diameter  
152 x 0.3 cm height) (Fig. 1A); one fly per chamber. Video recording (15 fps) was used to capture  
153 two-dimensional locomotion as the chamber restricts vertical movement (Video 1S). Fly tracking  
154 software (Xiao and Robertson, 2015), was used to calculate each fly's location every 0.2 s  
155 throughout the recording period. The positions (x, y) of each fly was exported to Excel  
156 spreadsheets to evaluate different parameters.

157

158 The total recording included periods of baseline activity (10 min), anoxia (30 s of N<sub>2</sub>), and post-  
159 anoxic activity (60 min) (Fig. 1B). During the experiment airflow was maintained at 2 L/min to  
160 avoid hypoxic conditions, and a N<sub>2</sub> (8 L/min) exposure was used to induce an anoxic coma. To  
161 allow animals to recover from handling, the first five minutes of each baseline recording was  
162 disregarded (Liu *et al.* 2007). Further, as placement in the chambers can injure the flies,  
163 individuals that failed to recover 10% of regular baseline activity (250 cm / 5 min) following  
164 anoxia were excluded from further analysis.

165

166 *Locomotor Activity Parameters*

167 (A) Pre-anoxia

168 Pre-anoxia parameters were used to evaluate changes in locomotor activity during the baseline  
169 period. Path Length (PL) was used to measure the total distance travelled (cm) during the 5

170 minute pre-anoxia period. Time at Rest (TAR) denotes a time period, 2 seconds or longer, during  
171 which the individual did not meet the defined 'activity' threshold (0.15 cm per second). This  
172 'inactive' time period was recorded as a percentage of the pre-anoxia time period. The rationale  
173 was that both PL and TAR could be used to evaluate the hyperactivity commonly associated with  
174 starvation (Lee and Park, 2004; Johnson et al., 2010).

175

#### 176 (B) Anoxia & Post-anoxia

177 Parameters during and after anoxia were used to characterize changes in susceptibility and  
178 tolerance to anoxic conditions. The parameters which evaluated susceptibility to anoxia (30 s of  
179 N<sub>2</sub>) include Time to Succumb (TS) (Fig. 2Aii). TS was measured as the time (s) from N<sub>2</sub> onset to  
180 the point when activity fell below the recovery threshold (< 0.30 cm per second). Recovery from  
181 anoxia, denoted Time to Recovery (TR), was measured as the time taken for locomotor activity  
182 to surpass a defined threshold (0.3 cm per second) at least 10 times within 60 consecutive  
183 seconds (Xiao and Robertson, 2016). The earliest time to reach the criterion is set as TR (Fig.  
184 2A). As normal TR occurs within 30 minutes, individuals that failed to meet the TR criterion  
185 within the 60 minute post-anoxia period were excluded in order to make comparisons between  
186 'recovered' individuals.

187

#### 188 *Spreading Depolarization: DC potential shifts*

189 Flies were placed head first into a disposable pipette tip, without the use of N<sub>2</sub>, and fixed in place  
190 using a small drop of wax. Using microscissors, a small window (0.06 x 0.02 mm) was made in  
191 the cuticle at the back of the head behind the ocelli (Rodriguez and Robertson, 2012). A  
192 chlorided silver wire was placed into the mid-thorax to ground the preparation. Next, a  
193 microelectrode pulled from a 1 mm diameter filamented glass capillary tube, backfilled with  
194 1mM KAC, was inserted at an approximate 45° angle through the window into the hemolymph.  
195 Further insertion of the microelectrode, from the hemolymph to the brain, was characterized by a  
196 negative shift in the resting DC potential.

197

198 SD in the fly brain was recorded by monitoring DC potential shifts using a Model 2000 pH/ion  
199 amplifier (World Precision Instruments Inc) using the electrophysiology software Clampex for  
200 later analysis using Clampfit (Molecular Devices, version 10.3). The recording period included  
201 periods of baseline activity (10 minutes), anoxia (30 seconds of N<sub>2</sub>), and post-anoxia (20  
202 minutes). Individuals that exhibited spontaneous, large amplitude DC shifts, which can result  
203 from damage, during the baseline recording period were discarded. Direct airflow was  
204 maintained throughout the experiment and N<sub>2</sub> was used to induce an anoxic coma.

205

#### 206 *Spreading Depolarization Parameters*

207 The baseline of each recording was adjusted to zero just before the start of anoxia (10 minutes)  
208 and after the major ionic disruption in order to normalize DC potential drift during the recording.  
209 The time to surge (s) was measured from the time nitrogen was turned on to the point at half-max

210 amplitude of the abrupt negative shift in DC potential. The time to recover (s) was measured  
211 from the time nitrogen was turned off to the point of half-max amplitude on the positive shift in  
212 DC potential. The peak amplitude (mV) during the anoxia was used to quantify the magnitude of  
213 spreading depolarization.

214

#### 215 *Measurement of Mass*

216 Adult flies were placed in a freezer (~30 min) before weighing to ensure complete  
217 immobilization, after which they were individually weighed to 1  $\mu$ g using a Cahn-microbalance.  
218 Controls were weighed at the same time of day to account for potential water loss. Pupae were  
219 weighed under similar conditions. Each pupa was dissected under a light-microscope to verify  
220 sex, and genotype via eye color.

221

#### 222 *Statistical Analyses*

223 Each locomotor activity test included all controls; for example both Gal4/+ and UAS/+ flies for  
224 genetic manipulations or drug-specific controls for flies fed AMPK pharmacology. As replicate  
225 data sets exhibited similar trends we compiled the data for statistical analyses.

226

227 Statistical analyses were performed using Sigma Plot 12.1 (Systat Software Inc.). Parametric  
228 tests performed were a t-test and one-way ANOVA when the distribution of residuals passed  
229 normality (Shapiro-Wilk). Non-parametric tests, when normality failed, included a Mann-  
230 Whitney Rank Sum Test and ANOVA on Ranks (Kruskal-Wallis) with Dunn's multiple  
231 comparisons. Significance levels were set at  $\alpha < 0.05$  and 0.10.

232

## 233 **Results**

234

### 235 *AMPK activation mimics starvation phenotype before and after anoxia*

236 To evaluate phenotypic changes in locomotor behavior before, during, and after exposure to  
237 anoxia we used a high-throughput locomotor assay and open-source software to track each fly's  
238 location (Fig. 1; see also Video 1S) (Xiao and Robertson, 2015). Flies placed within the  
239 restricted locomotor chamber engaged in near constant walking (Fig. 2) [Time at Rest (TAR):  
240  $8.7 \pm 2.1$  %; Path Length (PL):  $215.3 \pm 6.5$  cm]. When deprived of food for 24 hrs the flies  
241 exhibited a distinct 'starvation phenotype'. Starvation significantly decreased TAR  $4.3 \pm 0.36$  %  
242 and increased PL  $235.2 \pm 5.32$  cm (*Mann-Whitney*,  $U(31, 32) = 1184.5$ ,  $p = 0.008$ ; *Mann-*  
243 *Whitney*,  $U(31, 32) = 827$ ,  $p = 0.024$ ). When fed the AMPK activating compounds metformin  
244 and AICAR, w<sup>1118</sup> flies exhibited an increase in PL (Metformin: *t*-test,  $t = -3.355$ ,  $df = 30$ ,  $p$   
245  $= 0.001$ ; AICAR: *t*-test,  $t = -2.088$ ,  $df = 62$ ,  $p = 0.021$ ), however only metformin decreased TAR  
246 (Metformin: *Mann-Whitney*,  $U(16, 16) = 62.0$ ,  $p = 0.013$ ; AICAR: *Mann-Whitney*,  $U(32, 32) =$   
247  $460.5$ ,  $p = 0.493$ ). This suggests that, under normoxic conditions, pharmacological activation of  
248 AMPK has a similar effect on locomotor activity as starvation.

249

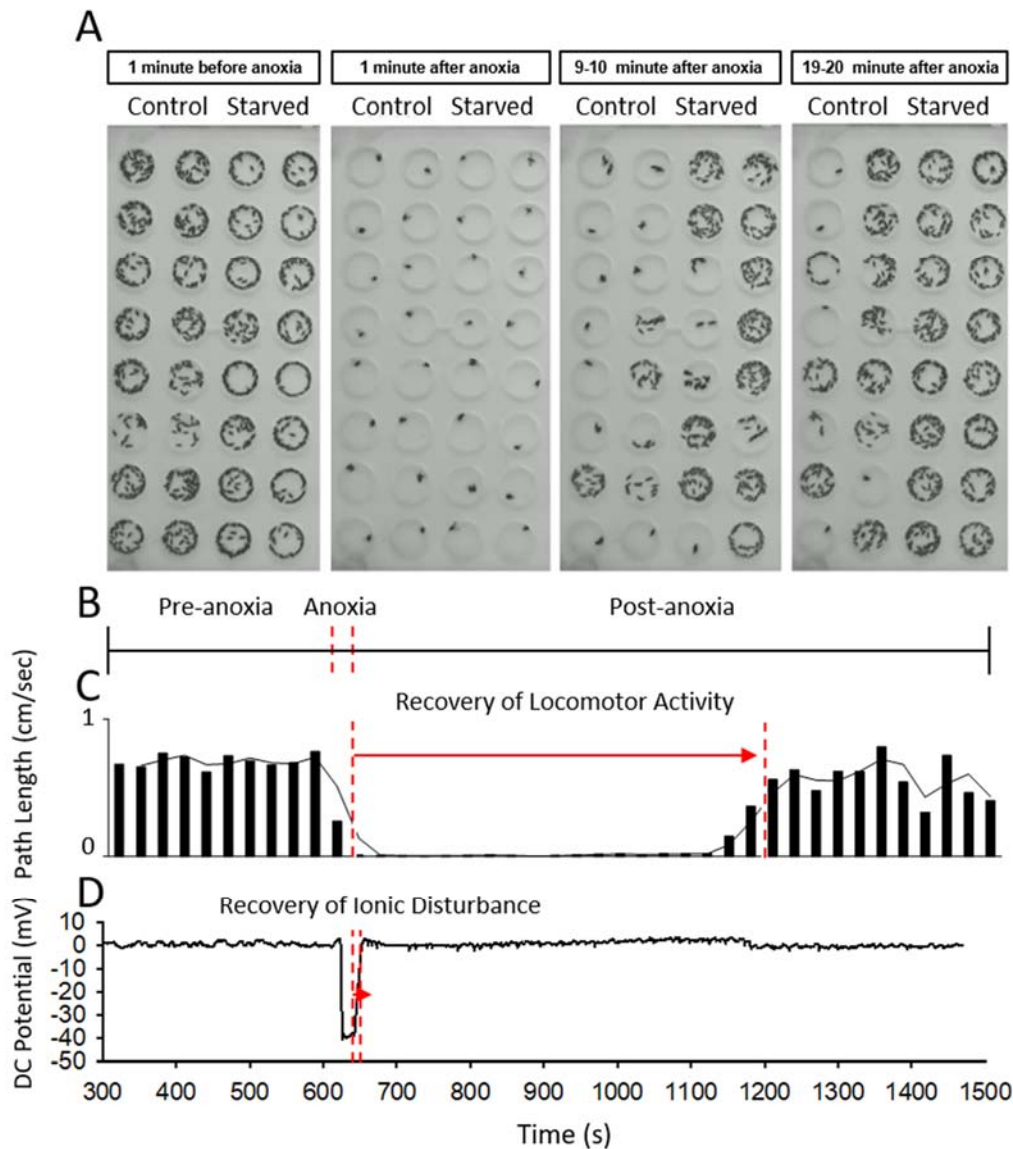

**Figure 1. Locomotor recovery from anoxic coma.** (A) Behavioral assay. Superimposed images (300) from 1 minute of video recording at 4 different time points before, during and after an anoxic coma. Each chamber contained a single fly. Note that starved flies recovered locomotion faster after an anoxic coma. See supplemental video, **Video 1S**. (B) The recording period includes baseline activity (10 min), anoxia (30 s of N<sub>2</sub>), and post-anoxic activity (60 min). (C) Locomotor recovery of an individual fly indicated by average path length (cm) every 30 seconds (columns) and a moving average of path length (line). Timing of anoxia aligned with B. (D) Extracellular recording of DC potential (mV) from the brain. Abrupt negative DC shift indicates spreading depolarization. Note that recovery of ion gradients occurs rapidly in contrast to recovery of locomotion. Timing of anoxia aligned with B and C.



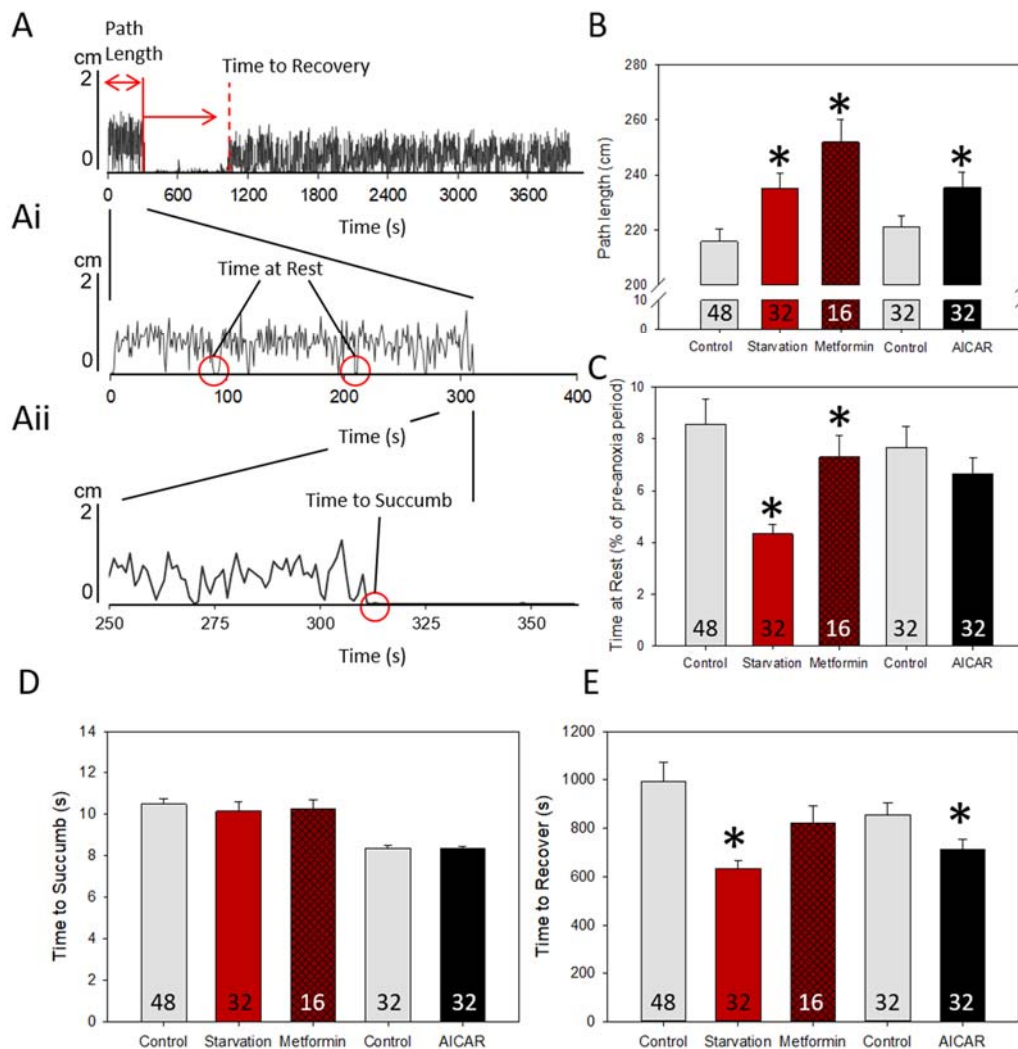

**Figure 2. Starvation and AMPK activation increase locomotor activity and speed recovery from an anoxic coma.** (A) **Ai** Locomotor activity parameters. Path Length (PL) is the distance (cm) traveled during the pre-anoxia period. Time at Rest (TAR) is the percentage of time during the pre-anoxia period that the individual does not meet the activity threshold ( $< 0.15$  cm/s) for periods of at least 2 s. Time to Recovery (TR) (s) indicated by the dashed line. **Aii** During anoxia (30 s of  $N_2$ ), the Time to Succumb (TS) is the time (s) from nitrogen on to a period of activity below the recovery threshold ( $< 0.30$  cm/s). (B, C) 24 hrs of starvation significantly increased PL and decreased TAR. Pharmacological activation of AMPK by feeding 100 mM metformin or 100 mM AICAR for four days mimicked the effects of starvation.  $p < 0.05$  (\*) by *t*-test or Mann-Whitney Rank Sum. (D) Treatments did not affect TS. (E) Starvation and AICAR significantly reduced TR.  $p < 0.05$  (\*) by Mann-Whitney Rank Sum. Data are plotted as mean  $\pm$  SE. Sample sizes are indicated in the bars. Starvation and metformin controls are combined for analysis; significance comparisons were made between treatments and their respective controls.

252 When exposed to brief anoxia (30 s of N<sub>2</sub>), w<sup>1118</sup> flies undergo stereotyped movements: rapid  
253 paralysis, falling over, and inactivity. We found that the time for flies to exhibit inactivity (Time  
254 to Succumb: TS) after exposure to anoxia was not significantly different after a 24 hr period of  
255 starvation, or when fed Metformin or AICAR (Fig. 2D) (Starvation: *Mann-Whitney, U* (31, 32) =  
256 463.0, *p* = 0.649; Metformin: *Mann-Whitney, U* (16, 16) = 113.0, *p* = 0.575; AICAR: *Mann-*  
257 *Whitney, U* (32, 32) = 1072.0, *p* = 0.631). Upon return to normoxia, w<sup>1118</sup> flies starved for 24 hrs  
258 or fed AICAR had a significantly shorter time to recover locomotion (Time to Recover: TR)  
259 (Starvation: *Mann-Whitney, U* (25, 32) = 253.0, *p* = 0.018; AICAR: *Mann-Whitney, U* (32, 32) =  
260 360.0, *p* = 0.042). While flies fed metformin showed a similar trend, treatment did not  
261 significantly affect TR (*Mann-Whitney, U* (16, 16) = 89.0, *p* = 0.147). To determine if this was  
262 due to neural mechanisms, we next investigated the effect of starvation and pharmacological  
263 activation of AMPK on ionic disruption in the brain during anoxia.

264  
265 To determine if AMPK could modify CNS tolerance to anoxia we induced a 30 s anoxic coma  
266 and monitored spreading depolarization (SD) in the brain. SD refers to the loss of ion gradients  
267 induced by a failure of ion homeostasis. The rise in extracellular K<sup>+</sup> and other ion disturbances  
268 induce a large negative shift in extracellular DC potential causing the invertebrate CNS to  
269 abruptly shut down in response to acute stress (Rodriguez and Robertson, 2012; Spong et al.,  
270 2016b). Anoxia induces SD in the fly brain, pre-anoxia positivity (1 s) and a large negative DC  
271 shift (surge) which is sustained until N<sub>2</sub> is turned off (Fig. 3A), that is similar to anoxic  
272 depolarization in the mammalian brain (Hansen, 1985; de Crespigny et al., 1999; Lindquist and  
273 Shuttleworth, 2017). We found that the time to CNS shutdown, defined as the time to half-max  
274 amplitude of the surge (s), was significantly longer when flies were starved 24 hours or fed  
275 metformin (Fig. 3B) (Starvation: *t*-test, *t* = -1.981, *df* = 19, *p* = 0.03); Metformin: *t*-test, *t* = -  
276 2.298, *df* = 20, *p* = 0.016). However, flies fed AICAR, which acts as a more direct activator of  
277 AMPK, did not exhibit a longer time to surge (*Mann-Whitney, U* (6, 10) = 25.0, *p* = 0.625). We  
278 next asked if starvation or AMPK pharmacology would affect the magnitude of SD in the fly  
279 brain.

280  
281 We predicted that flies with faster locomotor recovery would have smaller ionic disturbances  
282 during anoxia, enabling them to re-establish ionic gradients across cell membranes faster. What  
283 we found was that during anoxia, the peak amplitude was significantly smaller in flies fed  
284 Metformin or AICAR, but not after a 24 hr starvation period (Fig. 3C) (Metformin: *Mann-*  
285 *Whitney, U* (11, 11) = 22.0, *p* = 0.013; AICAR: *Mann-Whitney, U* (6, 10) = 14.0, *p* = 0.093;  
286 Starvation: *t*-test, *t* = 0.975, *df* = 19, *p* = 0.17). However, following anoxia, flies emerging from  
287 an anoxic coma, defined as the time to recover half-max amplitude (s), took significantly longer  
288 when fed Metformin or AICAR (Fig. 3D) (Metformin: *Mann-Whitney, U* (11, 11) = 16.0, *p* =  
289 0.004; AICAR: *Mann-Whitney, U* (6, 9) = 0.0, *p* = 0.002), while flies starved 24 hrs did not  
290 exhibit a difference (*Mann-Whitney, U* (10, 11) = 51.0, *p* = 0.805).

291

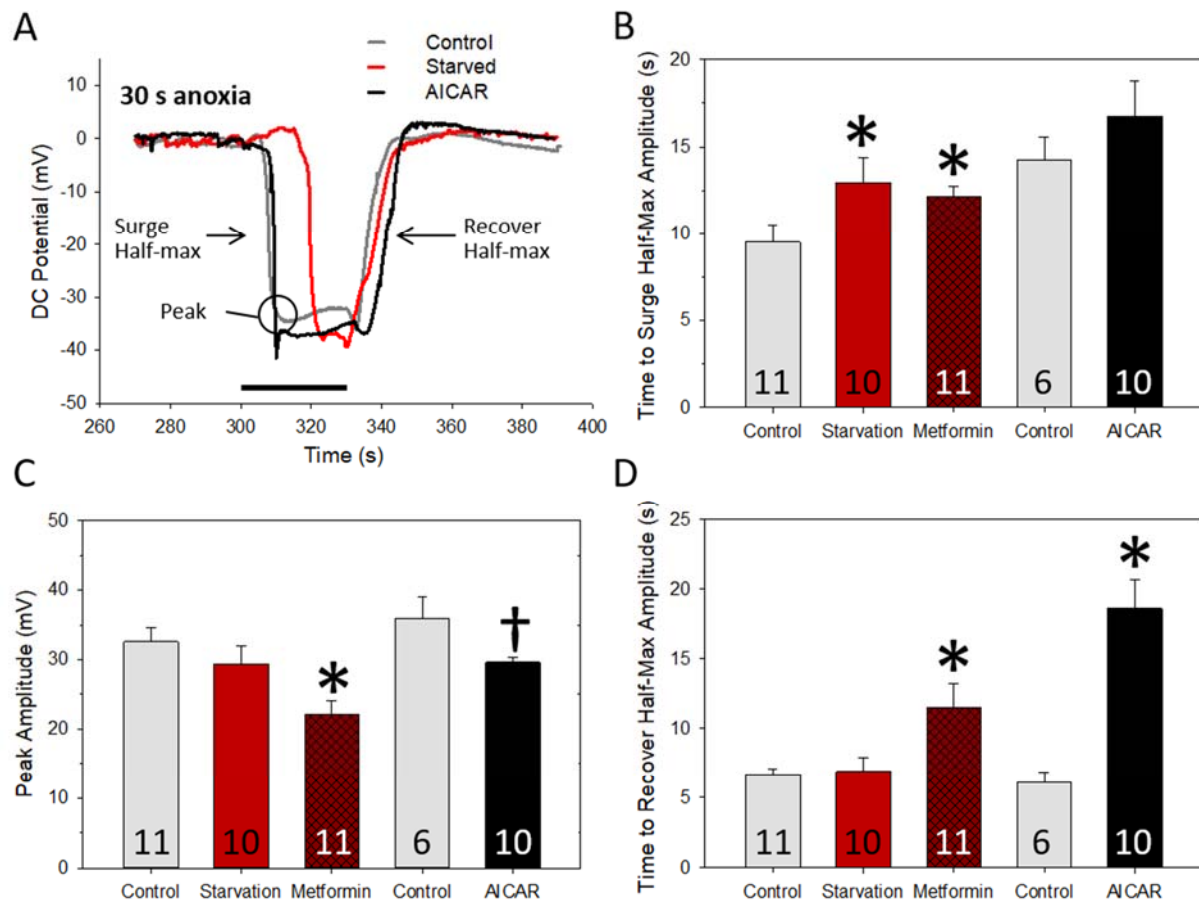

**Figure 3. Starvation and AMPK activation have similar effects on anoxia-induced SD in the brain.** (A) Representative extracellular recording of DC field potential showing abrupt negative shifts induced by anoxia in flies: control (grey), after 24 hrs starved (red), or fed 100 mM AICAR (black). The Peak (mV) of the DC shift was used to assess the magnitude of disruption. Time to Surge Half-Max Amplitude (s) and Time to Recover Half-Max Amplitude (s) were measured to assess the rate of failure and clearance mechanisms. (B) Time to Surge Half-Max Amplitude was longer in flies starved 24 hrs or fed 100 mM metformin.  $p < 0.05$  (\*) by *t*-test or Mann-Whitney Rank Sum. (C, D) Metformin or AICAR reduced peak amplitudes and increased Time to Recover Half-Max Amplitude.  $p < 0.05$  (\*), 0.10 (†) by *t*-test or Mann-Whitney Rank Sum. Data are plotted as mean  $\pm$  SE. Sample sizes are indicated in the bars. Starvation and metformin controls are combined for analysis; significance statistical comparisons were made between treatments and their respective controls.

293 Thus, contrary to what we expected, fast locomotor recovery did not correlate directly with  
294 smaller ionic disturbance and flies with a smaller peak amplitude took longer to recover CNS ion  
295 gradients after anoxia.

296

297 Although we have shown that both starvation and the AMPK activators Metformin and AICAR  
298 were able to modulate SD dynamics in the brain during anoxia, it was unclear whether the  
299 AMPK modulation of the speed of locomotor recovery after anoxia was mediated neurally. We  
300 tested this possibility using the *Drosophila* Gal4/UAS system to up- or downregulate the AMPK  
301 catalytic  $\alpha$  subunit activity in a tissue-specific manner.

302

### 303 *AMPK $\alpha$ subunit required for pupation*

304 We suspected that AMPK would be required during development as *Drosophila* larvae forage in  
305 a hypoxic medium (Callier et al., 2015). Complete loss of AMPK $\alpha$ , as seen in *ampka* mutants, is  
306 lethal in late second/third instar stages (Lee et al., 2007; Swick et al., 2013). Thus, we chose to  
307 restrict RNAi manipulation of AMPK $\alpha$  to neurons or glia. We were intrigued to find that a pan-  
308 neuronal up- or down-regulation of AMPK $\alpha$  did not affect developmental lethality, locomotor  
309 behavior, or recovery from anoxia (Fig. 4, Table 1S). In contrast, we found flies with pan-glial  
310 upregulation of AMPK $\alpha$  had a shorter anoxic recovery time (Figure 4B) (Student-Newman-  
311 Keuls Method,  $Q = 3.545, 3.754, p < 0.05$ ), however we were unable to test the effect of pan-  
312 glial AMPK $\alpha$  downregulation as these flies showed a male-specific lethality during pupation. As  
313 *dAMPK $\alpha$*  mutants exhibit low triglyceride levels, small fat body cells, and decreased larval size  
314 (Bland et al., 2010) we evaluated potential weight differences during pupation. We found that  
315 there was no weight difference in glial AMPK-RNAi male or female flies during pupation,  
316 consistent with a weight-independent lethality during pupation (Fig. 4F) (male pupae: ANOVA,  
317  $p > 0.05$ ; female pupae: Dunn's Method,  $Q = 1.926, 1.399, p > 0.05$ ). This suggests that  
318 AMPK $\alpha$  may be required in glial cells to regulate pupal metamorphosis. In order to circumvent  
319 this lethality we used glial subtypes to drive AMPK $\alpha$ -RNAi.

320

### 321 *Inhibition of glial AMPK $\alpha$ subunit induces severe metabolic defects*

322 Despite pan-glial AMPK $\alpha$ -RNAi lethality, males with AMPK $\alpha$ -RNAi in surface glia  
323 (subperineural: *NP2276*) or neuropil glia (astrocyte: *Alrm II, Alrm III, NP1243*; ensheathing:  
324 *mz0709, NP6520*) survived to adulthood. We found that RNAi of AMPK $\alpha$  in the neuropil glial  
325 *Alrm III, NP1243, mz0709* increased body weight (Fig. 4D; *Alrm III*: Holm-Sidak ANOVA,  $t(2)$   
326  $= 4.932, 4.639, p < 0.001$ ; *NP1243*: Dunn's Method H (2)  $= 44.033, p < 0.05$ ; *mz0709*: Holm-  
327 Sidak ANOVA,  $t(2) = 11.310, 10.852, p < 0.001$ ). When we evaluated locomotor behavior, we  
328 also found that nearly all glial subtypes exhibited reduced locomotor activity (Fig. 4C; *Alrm II*:  
329 Holm-Sidak ANOVA,  $t(2) = 5.167, 3.544, p < 0.001$ ; *Alrm III*:  $t(2) = 6.519, 4.743, p < 0.001$ ;  
330 *mz0709*: Dunn's Method,  $Q = 6.479, 6.630, p < 0.05$ ; *NP2276*: Holm-Sidak ANOVA,  $t(2) =$   
331  $6.878, 2.079, p < 0.05$ ; *NP6520*:  $t(2) = 6.846, 2.012, p < 0.05$ ). While it is unclear whether  
332 reduced locomotor activity in the AMPK $\alpha$ -RNAi glial lines was due to increased body weight, it  
333 is clear that a loss of AMPK $\alpha$  in glia severely disrupts regular metabolic function.

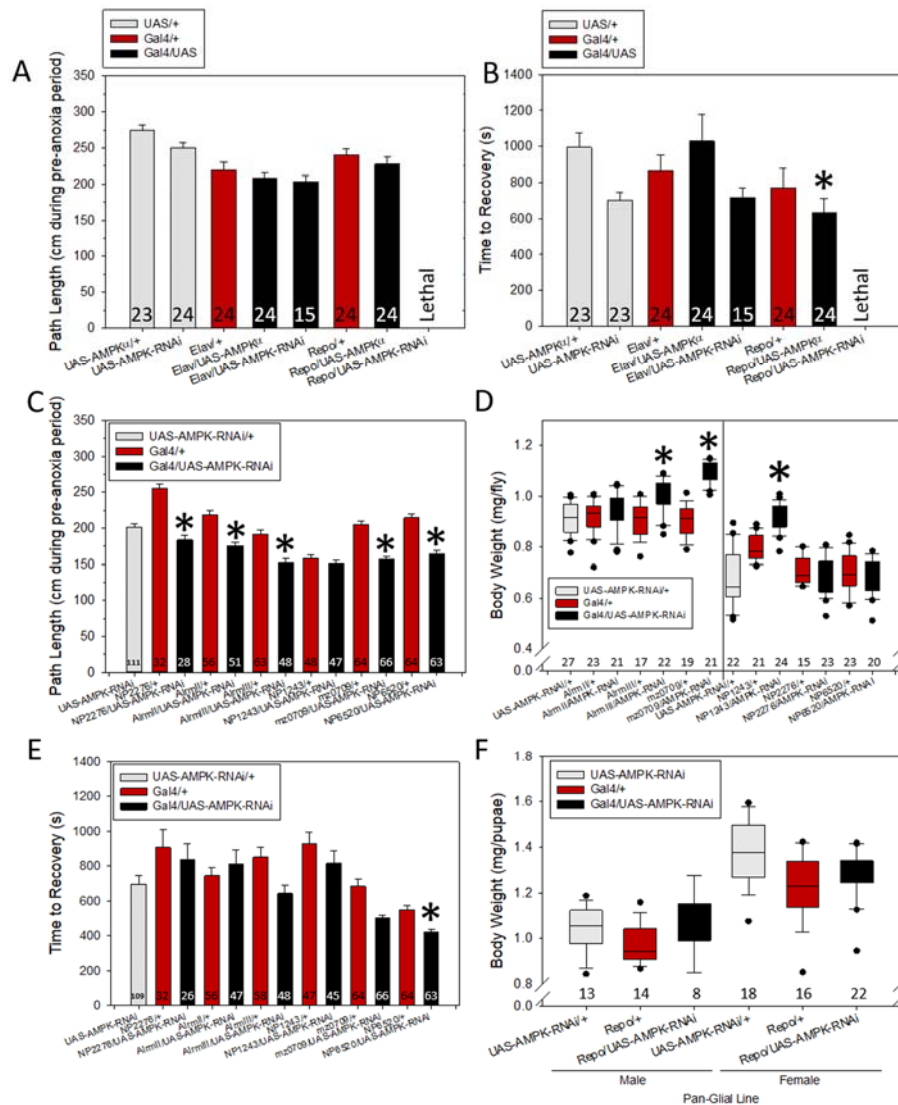

**Figure 4. Effects of manipulation of AMPK $\alpha$  subunit expression in neurons and glia.**

(A) Prolonged (6-8 day adults) upregulation or downregulation of the AMPK $\alpha$  subunit in pan-neuronal (*Elav*) or pan-glial (*Repo*) tissue had no effect on path length (PL). Pan-glial downregulation of the AMPK $\alpha$  subunit was lethal in larval stages. (B) Pan-glial upregulation of AMPK $\alpha$  significantly reduced TR.  $p < 0.05$  (\*) by Dunn's Method. (C, D) Glial-specific downregulation of the AMPK $\alpha$  subunit was investigated in surface (subperineural: *NP2276*) and neuropil (astrocyte: *Alrm II*, *Alrm III*, *NP1243*; ensheathing: *mz0709*, *NP6520*) glia. Downregulation of the AMPK $\alpha$  subunit significantly reduced PL in all glial-specific lines except *NP1243*. Downregulation in the astrocyte lines (*Alrm III*, *NP1243*) and ensheathing glial line (*mz0709*) significantly increased body weight. The black line in the middle indicates fly line weight was measured at separate times (controls specific to each group).  $p < 0.05$  (\*) by Dunn's Method or Holm-Sidak comparisons. (E) The ensheathing glial line *NP6520* reduced TR after anoxia.  $p < 0.05$  (\*) by Dunn's Method. (F) Pan-glial AMPK $\alpha$  downregulation had no effect on male or female body weight. Data are plotted as median  $\pm$  upper and lower quartiles or mean  $\pm$  SE. Sample sizes are indicated in bars or below boxplots.

335 As a higher rate of metabolism during anoxia could more rapidly deplete ATP required to  
336 maintain homeostasis (Galli and Richards, 2014), we were not surprised that a low metabolic rate  
337 phenotype - high body weight and low activity level - was associated with a significantly faster  
338 anoxic TR in the ensheathing glial line *NP6520/UAS-AMPK $\alpha$ -RNAi* (Fig. 4E; Dunn's Method,  
339  $Q = 5.413, 4.189, p < 0.05$ ). While *NP6520/UAS-AMPK $\alpha$ -RNAi* did exhibit a significantly  
340 faster TS than its controls, a phenotype not observed in the other glial subtypes, variations in TS  
341 were not associated with TR (Table 1S).

342

#### 343 *Gene-Switch line starvation phenotype*

344 We utilized temporal and spatial downregulation of AMPK $\alpha$  in order to identify AMPK-  
345 dependent tissues within the fly body during starvation. We chose to target AMPK $\alpha$ -RNAi in the  
346 fat body, oenocytes, and tracheal cells which become transcriptionally inactivated when flies are  
347 fed RU486 (mifepristone; Sigma-Aldrich) using Gene-Switch system lines, and scored  
348 starvation-induced lethality over an 84 hour period (Osterwalder et al., 2001). Consistent with  
349 research that shows pan-neuronal upregulation of AMPK shortens survival during starvation  
350 (Ulgherait et al., 2014), we found that AMPK $\alpha$  downregulation in the GSG3448 (fat body,  
351 oenocytes, and tracheal cells) or GSGB9-1 (oenocytes) lines extends survival. We also found  
352 that the GSG3448 line had a lower tolerance to starvation (without RU486) (86.21% survival)  
353 after 24 hours than the GSGB9-1 (100% survival) lines (Fig. 5C,D).

354

#### 355 *AMPK $\alpha$ subunit affects starvation phenotype*

356 If AMPK $\alpha$  was critical for one of the previously described starvation phenotypes - increased PL,  
357 reduced TAR, and fast TR - then its disruption using AMPK $\alpha$ -RNAi should abolish these effects.  
358 We first characterized each line's starvation phenotype. Starvation alone (without RU486) in  
359 AMPK $\alpha$ -RNAi Gene-Switch lines GSG3448 and GSGB9-1 caused a reduction in TAR  
360 (GSG3448: *Mann-Whitney, U* (30, 31) = 349,  $p = 0.095$ ; GSGB9-1: *t*-test,  $t = 2.171, df = 24, p$   
361  $= 0.020$ ). Following anoxic exposure, the GSGB9-1 line showed a trend towards reducing TR  
362 (Table 1S), however only the combined expression line GSG3448 had a significantly reduced TR  
363 after 24 hrs of starvation (GSG3448: *Mann-Whitney, U* (29, 31) = 302.5,  $p = 0.030$ ). This  
364 suggests, consistent with the results above, that these lines may have varying tolerance to  
365 starvation.

366

367 When feeding RU486 to inactivate AMPK $\alpha$  we found that only the combined expression line  
368 GSG3448 significantly affected the starvation phenotype. Starvation on agar with RU486  
369 abolished the starvation-TAR phenotype; comparing starvation alone and starvation with RU486  
370 (Fig. 5A) (*Mann-Whitney, U* (26, 31) = 296.5,  $p = 0.088$ ). As well, starved GSG3448 flies no  
371 longer had a fast TR when fed RU486 (Fig. 5B) (*Mann-Whitney, U* (25, 31) = 291,  $p = 0.114$ ).  
372 This suggests that during starvation the regulation of AMPK $\alpha$  through multiple tissues, either via  
373 a cooperative or an additive effect, may be required to induce a starvation phenotype.

374

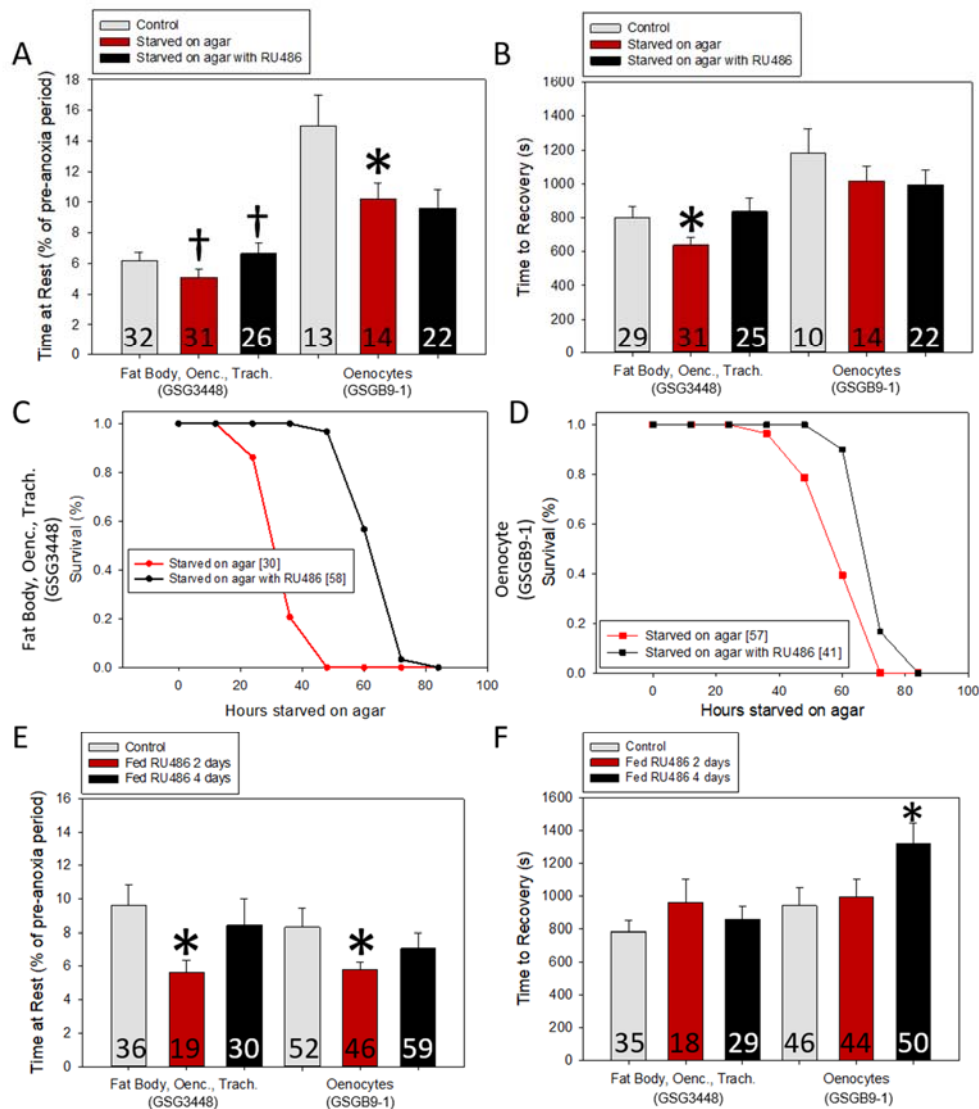

**Figure 5. Effects of manipulation of AMPK $\alpha$  subunit expression in fat body and oenocytes with and without starvation.** (A,B) Starvation (24 hr) induced hyperactivity in both the combined fat body, oenocyte, tracheal cell (GSG3448) and oenocyte (GSGB9-1) lines. Downregulation of the AMPK $\alpha$  subunit in the combined fat body, oenocyte, tracheal cell by adding 10  $\mu$ g/mL RU486 to the agar increased TAR and blocked the effect of starvation on anoxic TR.  $p < 0.05$  (\*) by Mann-Whitney Rank Sum. (C, D) Survival curves of tissue-specific lines during starvation: agar alone (red line); agar with RU486 (black line). The combined fat body, oenocyte, tracheal cell line shows improved survival on agar with RU486 compared with the oenocyte line. (E, F) Both the combined fat body, oenocyte, tracheal cell and oenocyte lines had reduced TAR after 2 days fed RU486 but did not exhibit changes in anoxic TR. After four days fed RU486 both lines exhibit regular locomotor activity, however reduced AMPK $\alpha$  subunit affected the oenocyte line's anoxic TR.  $p < 0.05$  (\*) by Mann-Whitney Rank Sum. Data are plotted as mean  $\pm$  SE. Sample sizes are indicated in bars. Significance comparisons were made as (control) vs. (starvation on agar) or (starvation on agar) vs. (starvation on agar with RU486).

376 However, as the GSG3448 line had a lower tolerance to starvation (Fig. 5C-E), we cannot rule  
377 out the possibility that AMPK $\alpha$  is simply upregulated more after 24 hrs of starvation than the  
378 single tissue line; resulting in a larger inhibitory effect of RU486.

379

380 *Short-term AMPK $\alpha$  subunit down-regulation affects locomotor behavior and tolerance to anoxia*

381 To address the acute effects of reduced AMPK $\alpha$  subunit in the oenocyte and fat body, flies were  
382 fed RU486 for two and four days. We found that a two day downregulation of AMPK $\alpha$  in the  
383 GSG3448 and GSGB9-1 lines reduced TAR, which suggests a basal level of AMPK $\alpha$  may be  
384 active in these tissues and that the loss of AMPK $\alpha$  can modify locomotor behavior (Fig. 5E;  
385 GSG3448: *Mann-Whitney, U* (19, 36) = 181.5,  $p = 0.005$ ; GSGB9-1: *Mann-Whitney, U* (46, 52)  
386 = 906,  $p = 0.039$ ). However, flies fed RU486 for four days do not show this effect (GSG3448:  
387 *Mann-Whitney, U* (30, 36) = 430,  $p = 0.158$ ; GSGB9-1: *Mann-Whitney, U* (52, 59) = 1290,  $p =$   
388 0.151). This return to regular locomotor behavior indicates that under normoxic conditions the  
389 fly may attempt to compensate for a loss of basal AMPK $\alpha$  within these tissues. However when  
390 faced with anoxic stress, AMPK $\alpha$  flies fed RU486 for four days took significantly longer to  
391 recover locomotor activity (TR: *Mann-Whitney, U* (46, 50) = 796,  $p = 0.010$ ). This suggests  
392 mechanisms of basal AMPK $\alpha$  compensation were unable to help the fly during anoxic stress;  
393 which may require AMPK upregulation.

394

## 395 **Discussion**

396

397 We investigated how food restriction affects the response of the nervous system to anoxia in  
398 adult *Drosophila*. Our main conclusions are: 1. Prior starvation speeds recovery of locomotion  
399 from an anoxic coma and this is mimicked by pharmacological treatments that would activate  
400 AMPK. 2. Collapse and restoration of ion gradients with anoxia/re-oxygenation are modulated  
401 by starvation and AMPK. This contributes little to the timing of recovery of locomotor circuit  
402 function, however, it could affect the susceptibility to SD. This remains to be determined. 3.  
403 Locomotor circuit recovery after anoxia is modulated by AMPK activity in glia, particularly the  
404 ensheathing glial subtype, rather than neurons. 4. AMPK in tissues that supply energy to the  
405 CNS (e.g. fat body, oenocytes and glia) can modulate locomotor circuit recovery and survival  
406 during periods of starvation.

407

408 We characterized a starvation phenotype of adult flies before, during, and after exposure to brief  
409 anoxia and contrasted this with the pharmacological activation of AMPK. We showed that when  
410 confined within a small arena, starving flies will modify their locomotor behavior to increase  
411 their distance travelled by spending less time inactive. A similar hyperactivity can be seen in  
412 flies fed metformin or AICAR. During anoxia, we found that starved flies are able to delay SD in  
413 the brain, however this does not affect the magnitude of SD or dynamics of the recovery of ion  
414 gradients. In contrast, flies fed metformin or AICAR display a smaller ionic disruption and  
415 prolonged recovery following SD. As both metformin and AICAR affect adenosine - (1)



416 metformin decreases adenosine deaminase and (2) AICAR upon phosphorylation to ZMP shares  
417 structural similarities with adenosine - this finding parallels work in mammals which shows that  
418 SD impairs neurotransmission and that increased adenosine prolongs depression of  
419 electrocorticographic activity (Ouyang et al., 2011; Lindquist and Shuttleworth, 2017).  
420 Following anoxia, both pharmacological activation of AMPK and starvation improved locomotor  
421 recovery rates following anoxia. As both dietary restriction and pharmacological activators of  
422 AMPK have been previously shown to modulate oxidative stress in mammalian (Walsh et al.,  
423 2014; Shen et al., 2017) and non-mammalian organisms (Vigne et al., 2009; LaRue and Padilla,  
424 2011), here we provide a tissue-specific evaluation of AMPK in modulating anoxic tolerance.  
425 We show that in the fly body, the oenocyte and fat body have independent and context-specific  
426 roles in anoxic tolerance, whereas glia is the sole AMPK-dependent tissue in the brain.

427

#### 428 *Starvation, AMPK in the liver and oenocytes*

429 Under fed conditions the fly fat body is involved in the steady transfer of lipids to the oenocytes  
430 (Brasaemle, 2007). In starved flies lipids accumulate in the oenocytes (Gutierrez et al., 2007).  
431 Lipid accumulation in the fly oenocytes is thought to function similar to a mammalian liver,  
432 whereby lipids are mobilized to a reserve pool to 'fuel' ketogenesis, a process which provides an  
433 alternative energy source to the brain during energetic stress. It has been suggested that ketone  
434 bodies act as a glucose-replacing fuel, during enhanced neuronal activity, as they are  
435 preferentially used for neuronal energy (Izumi et al., 1997; Blazquez et al., 1999). It has been  
436 previously reported that ketone bodies protect the brain from hypoxia and ischemic injury (Go et  
437 al., 1988; Auestad et al., 1991). Here we provide data that show, consistent with a pathway from  
438 lipid accumulation to neuroprotective ketogenesis, that starvation modifies anoxic tolerance.

439

440 As the 'metabolic load' of the mammalian liver is split between the oenocyte and fat body in  
441 flies, we sought to determine whether AMPK in these tissues affects starvation-induced anoxic  
442 tolerance. Previous work investigating lipogenesis in *Drosophila* has shown that AMPK acts as a  
443 master switch for lipid regulation: AMPK upregulation, through the feeding of metformin,  
444 decreases total lipid content in the fly; and AMPK downregulation via the expression of a  
445 dominant negative alpha subunit variant, increases lipid content in the fly oenocytes (Johnson et  
446 al., 2010; Slack et al., 2012). Following this logic, decreasing AMPK during starvation should  
447 increase available lipid content for ketogenenic oxidation, and further increase anoxic tolerance.  
448 However, we found that when we disrupted AMPK $\alpha$  in the combined fat body, oenocytes, and  
449 tracheal cells line, but not the oenocyte line, the beneficial aspects of starvation are lost. This  
450 suggests that lipid accumulation is likely not the sole factor which allows starved individuals to  
451 tolerate anoxic bouts, but rather AMPK-dependent mechanisms in the fat body. AMPK has been  
452 shown to phosphorylate acetyl-CoA carboxylase (ACC1, ACC2) which turns off fatty acid  
453 synthesis and turns on fatty acid oxidation in an effort to conserve energy while producing ATP  
454 (Hardie, 2007). We therefore suggest that under global energetic stress, as induced by prolonged

455 starvation, the AMPK-dependent shutdown of energetically expensive pathways outweighs the  
456 production of alternative catabolic pathways.  
457 In unstressed, fed conditions the disruption of AMPK $\alpha$  in oenocytes had a time-dependent effect  
458 on tolerance to anoxic conditions. We report that downregulation of AMPK $\alpha$  for two days in  
459 either the combined fat body, oenocyte, and tracheal cell or oenocyte lines increased  
460 hyperactivity, and note that this trend was diminished by day four. Our observation is consistent  
461 with multiple observations that AMPK alters locomotor behavior (Lee and Park, 2004; Johnson  
462 et al., 2010; Ahmadi and Roy, 2016; Moller et al., 2016). We suspect that by day four regular  
463 behavior returns to normal due to the upregulation of other AMPK subunits, as has been seen in  
464 mice  $\beta$ 2 KO mice (Steinberg et al., 2010), or through an independent compensatory pathway.  
465 Despite a return to regular locomotor behavior, we found that flies with reduced AMPK $\alpha$  in the  
466 oenocytes alone take a longer time to recover from anoxia; suggesting even in fed conditions a  
467 prolonged reduction of AMPK $\alpha$  in the oenocytes affects susceptibility to anoxic stresses.

#### 468 469 *Neuronal AMPK in anoxic tolerance*

470 While AMPK-driven ketogenesis is primarily thought to be derived from hepatic tissue, several  
471 studies have explored ketogenic machinery in neuronal tissue. In mammals AMPK is primarily  
472 expressed in neurons with some expression in astrocyte glia (Turnley et al., 1999; Culmsee et al.,  
473 2001). In particular, astrocyte glia has been shown to exhibit similar ketogenic machinery as  
474 hepatocytes (reviewed in (Guzman and Blazquez, 2004)): a preference for fatty acids over  
475 glucose as a primary metabolic fuel during ketogenesis (McGarry and Foster, 1980; Blazquez et  
476 al., 1998); carnitine palmitoyltransferase I (CPT-I) is the metabolic pace-setting step of  
477 ketogenesis (Drynan et al., 1996; Blazquez et al., 1998); similar ketogenic inhibitors, malonyl-  
478 CoA for CPT-I and acetyl-CoA carboxylase for malonyl-CoA, are observed in both astrocytes  
479 and hepatocytes (McGarry and Brown, 1997; Blazquez et al., 1998). However, as a primary  
480 signaling molecule, AMPK has also been shown to protect against neurotoxicity (Eom et al.,  
481 2016), increase neuronal survival following glucose deprivation or chemical hypoxia (Culmsee  
482 et al., 2001), mediate macrophage phagocytosis (Quan et al., 2015), and increase autophagy post-  
483 stroke to decrease infarct volume (Shen et al., 2017), amongst other findings. While we don't  
484 address the mechanisms which modulate anoxic tolerance in *Drosophila*, we do report,  
485 consistent with these findings, that upregulating AMPK $\alpha$  in glia affects locomotor recovery  
486 following anoxia. Further, to the best of our knowledge, our finding that AMPK $\alpha$  neural up- or  
487 down-regulation in *Drosophila* does not affect post-anoxia recovery has not been previously  
488 reported. Our data in combination with work in the fly showing glial but not neural Hsp70  
489 mitigates loss of ion homeostasis during repetitive anoxic stress (Armstrong et al., 2011), suggest  
490 that in contrast to mammalian models, in *Drosophila*, glia is an effective target to manipulate  
491 anoxic tolerance in the fly brain.

492  
493 In addition to evaluating neuronal AMPK up-regulation in anoxia tolerance in *Drosophila*, we  
494 suspected RNAi knockdown would prolong locomotor recovery times. First, we found that

495 AMPK-RNAi was shown to be lethal in pan-glial but not pan-neural tissue during pupation. As  
496 AMPK inhibition was previously shown to block glycolysis in cultured mammalian astrocytes  
497 but not neurons (Funes et al., 2014), we were not surprised to find that others have shown  
498 dsRNA directed against components of the glycolytic pathway - trehalose, aldolase, and pyruvate  
499 - resulted in late larval and early pupal lethality in pan-glial but not pan-neural tissue in  
500 *Drosophila* (Volkenhoff et al., 2015). To avoid AMPK-RNAi pan-glial lethality, we targeted  
501 specific glial subtypes. Contrary to what we suspected, flies seemed to recover faster from  
502 anoxia. However, nearly all glial-specific knockdown lines had lower locomotory activity and  
503 higher body weight. This finding was again consistent with Volkenhoff *et al.*'s 2015 work, which  
504 showed that a knockdown of components in the glycolytic pathway that did not cause lethality  
505 showed severe locomotor defects when expressed in glia. Together these findings highlight the  
506 importance of the AMPK pathway in glia but not neurons for pupal development and locomotor  
507 behavior. Unfortunately, due to the likely changes in metabolism in these lines there is little we  
508 can say about AMPK disruption during anoxia without first uncoupling the existing phenotype  
509 changes. This work raises many questions as to not only what role glial AMPK plays in pupal  
510 development, but also how AMPK functions in these glial subtypes to regulate regular metabolic  
511 rate.

512

### 513 **Acknowledgements**

514

515 We thank Laurent Seroude for his comments on the manuscript and Adam Chippindale for  
516 access to a Cahn-microbalance to weigh flies. Funded by a Discovery Grant to RMR from the  
517 Natural Sciences and Engineering Research Council of Canada.

518

### 519 **Competing Interests**

520

521 The authors declare no conflicts of interest.

522

### 523 **References**

524

- 525 Ahmadi M, Roy R (2016) AMPK acts as a molecular trigger to coordinate glutamatergic signals  
526 and adaptive behaviours during acute starvation. *Elife* 5:e16349.
- 527 Armstrong GA, Xiao C, Krill JL, Seroude L, Dawson-Scully K, Robertson RM (2011) Glial  
528 Hsp70 protects K<sup>+</sup> homeostasis in the *Drosophila* brain during repetitive anoxic  
529 depolarization. *PLoS One* 6:e28994.
- 530 Auestad N, Korsak RA, Morrow JW, Edmond J (1991) Fatty acid oxidation and ketogenesis by  
531 astrocytes in primary culture. *J Neurochem* 56:1376-1386.
- 532 Awasaki T, Lai SL, Ito K, Lee T (2008) Organization and postembryonic development of glial  
533 cells in the adult central brain of *Drosophila*. *J Neurosci* 28:13742-13753.
- 534 Benasayag-Meszaros R, Risley MG, Hernandez P, Fendrich M, Dawson-Scully K (2015)  
535 Pushing the limit: Examining factors that affect anoxia tolerance in a single genotype of  
536 adult *D. melanogaster*. *Scientific reports* 5:9204.

- 537 Bland ML, Lee RJ, Magallanes JM, Foskett JK, Birnbaum MJ (2010) AMPK supports growth in  
538 *Drosophila* by regulating muscle activity and nutrient uptake in the gut. *Dev Biol*  
539 344:293-303.
- 540 Blazquez C, Sanchez C, Velasco G, Guzman M (1998) Role of carnitine palmitoyltransferase I  
541 in the control of ketogenesis in primary cultures of rat astrocytes. *J Neurochem* 71:1597-  
542 1606.
- 543 Blazquez C, Woods A, de Ceballos ML, Carling D, Guzman M (1999) The AMP-activated  
544 protein kinase is involved in the regulation of ketone body production by astrocytes. *J*  
545 *Neurochem* 73:1674-1682.
- 546 Brasaemle DL (2007) Thematic review series: adipocyte biology. The perilipin family of  
547 structural lipid droplet proteins: stabilization of lipid droplets and control of lipolysis. *J*  
548 *Lipid Res* 48:2547-2559.
- 549 Callier V, Hand SC, Campbell JB, Biddulph T, Harrison JF (2015) Developmental changes in  
550 hypoxic exposure and responses to anoxia in *Drosophila melanogaster*. *J Exp Biol*  
551 218:2927-2934.
- 552 Culmsee C, Monnig J, Kemp BE, Mattson MP (2001) AMP-activated protein kinase is highly  
553 expressed in neurons in the developing rat brain and promotes neuronal survival  
554 following glucose deprivation. *J Mol Neurosci* 17:45-58.
- 555 de Crespigny AJ, Rother J, Beaulieu C, Moseley ME, Hoehn M (1999) Rapid monitoring of  
556 diffusion, DC potential, and blood oxygenation changes during global ischemia. Effects  
557 of hypoglycemia, hyperglycemia, and TTX. *Stroke* 30:2212-2222.
- 558 Dreier JP, Reiffurth C (2015) The stroke-migraine depolarization continuum. *Neuron* 86:902-  
559 922.
- 560 Drynan L, Quant PA, Zammit VA (1996) Flux control exerted by mitochondrial outer membrane  
561 carnitine palmitoyltransferase over beta-oxidation, ketogenesis and tricarboxylic acid  
562 cycle activity in hepatocytes isolated from rats in different metabolic states. *Biochem J*  
563 317:791-795.
- 564 Eom JW, Lee JM, Koh JY, Kim YH (2016) AMP-activated protein kinase contributes to zinc-  
565 induced neuronal death via activation by LKB1 and induction of Bim in mouse cortical  
566 cultures. *Mol Brain* 9:14.
- 567 Funes HA, Apostolova N, Alegre F, Blas-Garcia A, Alvarez A, Marti-Cabrera M, Esplugues JV  
568 (2014) Neuronal bioenergetics and acute mitochondrial dysfunction: a clue to  
569 understanding the central nervous system side effects of efavirenz. *J Infect Dis* 210:1385-  
570 1395.
- 571 Galli GL, Richards JG (2014) Mitochondria from anoxia-tolerant animals reveal common  
572 strategies to survive without oxygen. *J Comp Physiol B* 184:285-302.
- 573 Gibson CL, Murphy AN, Murphy SP (2012) Stroke outcome in the ketogenic state--a systematic  
574 review of the animal data. *J Neurochem* 123 Suppl 2:52-57.
- 575 Go KG, Prenen GH, Korf J (1988) Protective effect of fasting upon cerebral hypoxic-ischemic  
576 injury. *Metab Brain Dis* 3:257-263.
- 577 Gutierrez E, Wiggins D, Fielding B, Gould AP (2007) Specialized hepatocyte-like cells regulate  
578 *Drosophila* lipid metabolism. *Nature* 445:275-280.
- 579 Guzman M, Blazquez C (2004) Ketone body synthesis in the brain: possible neuroprotective  
580 effects. *Prostaglandins Leukot Essent Fatty Acids* 70:287-292.
- 581 Hansen AJ (1985) Effect of anoxia on ion distribution in the brain. *Physiol Rev* 65:101-148.

- 582 Hardie DG (2007) AMP-activated/SNF1 protein kinases: conserved guardians of cellular energy.  
583 Nat Rev Mol Cell Biol 8:774-785.
- 584 Hardie DG, Carling D, Carlson M (1998) The AMP-activated/SNF1 protein kinase subfamily:  
585 metabolic sensors of the eukaryotic cell? Annu Rev Biochem 67:821-855.
- 586 Hardie DG, Salt IP, Hawley SA, Davies SP (1999) AMP-activated protein kinase: an  
587 ultrasensitive system for monitoring cellular energy charge. Biochem J 338 ( Pt 3):717-  
588 722.
- 589 Hawley SA, Selbert MA, Goldstein EG, Edelman AM, Carling D, Hardie DG (1995) 5'-AMP  
590 activates the AMP-activated protein kinase cascade, and Ca<sup>2+</sup>/calmodulin activates the  
591 calmodulin-dependent protein kinase I cascade, via three independent mechanisms. J Biol  
592 Chem 270:27186-27191.
- 593 Hochachka PW, Buck LT, Doll CJ, Land SC (1996) Unifying theory of hypoxia tolerance:  
594 molecular/metabolic defense and rescue mechanisms for surviving oxygen lack. Proc  
595 Natl Acad Sci U S A 93:9493-9498.
- 596 Izumi Y, Benz AM, Katsuki H, Zorumski CF (1997) Endogenous monocarboxylates sustain  
597 hippocampal synaptic function and morphological integrity during energy deprivation. J  
598 Neurosci 17:9448-9457.
- 599 Jibb LA, Richards JG (2008) AMP-activated protein kinase activity during metabolic rate  
600 depression in the hypoxic goldfish, *Carassius auratus*. J Exp Biol 211:3111-3122.
- 601 Johnson EC, Kazgan N, Bretz CA, Forsberg LJ, Hector CE, Worthen RJ, Onyenwoke R,  
602 Brenman JE (2010) Altered metabolism and persistent starvation behaviors caused by  
603 reduced AMPK function in *Drosophila*. PLoS One 5:e12799.
- 604 LaRue BL, Padilla PA (2011) Environmental and genetic preconditioning for long-term anoxia  
605 responses requires AMPK in *Caenorhabditis elegans*. PLoS One 6:e16790.
- 606 Lee G, Park JH (2004) Hemolymph sugar homeostasis and starvation-induced hyperactivity  
607 affected by genetic manipulations of the adipokinetic hormone-encoding gene in  
608 *Drosophila melanogaster*. Genetics 167:311-323.
- 609 Lee JH, Koh H, Kim M, Kim Y, Lee SY, Karess RE, Lee SH, Shong M, Kim JM, Kim J, Chung  
610 J (2007) Energy-dependent regulation of cell structure by AMP-activated protein kinase.  
611 Nature 447:1017-1020.
- 612 Li J et al. (2016) An obligatory role for neurotensin in high-fat-diet-induced obesity. Nature  
613 533:411-415.
- 614 Lighton JR, Schilman PE (2007) Oxygen reperfusion damage in an insect. PLoS One 2:e1267.
- 615 Lindquist BE, Shuttleworth CW (2017) Evidence that adenosine contributes to Leao's spreading  
616 depression in vivo. J Cereb Blood Flow Metab 37:1656-1669.
- 617 Mantovani J, Roy R (2011) Re-evaluating the general(ized) roles of AMPK in cellular  
618 metabolism. FEBS Lett 585:967-972.
- 619 Manwani B, McCullough LD (2013) Function of the master energy regulator adenosine  
620 monophosphate-activated protein kinase in stroke. J Neurosci Res 91:1018-1029.
- 621 McGarry JD, Foster DW (1980) Regulation of hepatic fatty acid oxidation and ketone body  
622 production. Annu Rev Biochem 49:395-420.
- 623 McGarry JD, Brown NF (1997) The mitochondrial carnitine palmitoyltransferase system. From  
624 concept to molecular analysis. Eur J Biochem 244:1-14.
- 625 Moller LL, Sylow L, Gotzsche CR, Serup AK, Christiansen SH, Weikop P, Kiens B, Woldbye  
626 DP, Richter EA (2016) Decreased spontaneous activity in AMPK alpha2 muscle specific

- 627 kinase dead mice is not caused by changes in brain dopamine metabolism. *Physiol Behav*  
628 164:300-305.
- 629 Money TGA, Sproule MKJ, Hamour AF, Robertson RM (2014) Reduction in neural  
630 performance following recovery from anoxic stress Is mimicked by AMPK pathway  
631 activation. *Plos One* 9:e88570.
- 632 Murray AJ, Knight NS, Cole MA, Cochlin LE, Carter E, Tchabanenko K, Pichulik T, Gulston  
633 MK, Atherton HJ, Schroeder MA, Deacon RM, Kashiwaya Y, King MT, Pawlosky R,  
634 Rawlins JN, Tyler DJ, Griffin JL, Robertson J, Veech RL, Clarke K (2016) Novel ketone  
635 diet enhances physical and cognitive performance. *Faseb J* 30:4021-4032.
- 636 Osterwalder T, Yoon KS, White BH, Keshishian H (2001) A conditional tissue-specific  
637 transgene expression system using inducible GAL4. *Proc Natl Acad Sci U S A* 98:12596-  
638 12601.
- 639 Ouyang J, Parakhia RA, Ochs RS (2011) Metformin activates AMP kinase through inhibition of  
640 AMP deaminase. *J Biol Chem* 286:1-11.
- 641 Quan H, Kim JM, Lee HJ, Lee SH, Choi JI, Bae HB (2015) AICAR Enhances the phagocytic  
642 ability of macrophages towards apoptotic cells through P38 mitogen activated protein  
643 kinase activation independent of AMP-Activated protein kinase. *PLoS One* 10:e0127885.
- 644 Rodgers-Garlick CI, Armstrong GAB, Robertson RM (2011) Metabolic stress modulates motor  
645 patterning via AMP-activated protein kinase. *J Neurosci* 31:3207-3216.
- 646 Rodriguez EC, Robertson RM (2012) Protective effect of hypothermia on brain potassium  
647 homeostasis during repetitive anoxia in *Drosophila melanogaster*. *Journal of*  
648 *Experimental Biology* 215:4157-4165.
- 649 Schulz JG, Laranjeira A, Van Huffel L, Gartner A, Vilain S, Bastianen J, Van Veldhoven PP,  
650 Dotti CG (2015) Glial beta-oxidation regulates *Drosophila* energy metabolism. *Sci Rep*  
651 5:7805.
- 652 Shen P, Hou S, Zhu M, Zhao M, Ouyang Y, Feng J (2017) Cortical spreading depression  
653 preconditioning mediates neuroprotection against ischemic stroke by inducing AMP-  
654 activated protein kinase-dependent autophagy in a rat cerebral ischemic/reperfusion  
655 injury model. *J Neurochem* 140:799-813.
- 656 Slack C, Foley A, Partridge L (2012) Activation of AMPK by the putative dietary restriction  
657 mimetic metformin is insufficient to extend lifespan in *Drosophila*. *PLoS One* 7:e47699.
- 658 Spong KE, Andrew RD, Robertson RM (2016a) Mechanisms of spreading depolarization in  
659 vertebrate and insect central nervous systems. *J Neurophysiol* 116:1117-1127.
- 660 Spong KE, Rodriguez EC, Robertson RM (2016b) Spreading depolarization in the brain of  
661 *Drosophila* is induced by inhibition of the Na<sup>+</sup>/K<sup>+</sup>-ATPase and mitigated by a decrease  
662 in activity of protein kinase G. *J Neurophysiol* 116:1152-1160.
- 663 Staples JF, Buck LT (2009) Matching cellular metabolic supply and demand in energy-stressed  
664 animals. *Comp Biochem Physiol A Mol Integr Physiol* 153:95-105.
- 665 Steinberg GR, O'Neill HM, Dzamko NL, Galic S, Naim T, Koopman R, Jorgensen SB,  
666 Honeyman J, Hewitt K, Chen ZP, Schertzer JD, Scott JW, Koentgen F, Lynch GS, Watt  
667 MJ, van Denderen BJ, Campbell DJ, Kemp BE (2010) Whole body deletion of AMP-  
668 activated protein kinase  $\beta$ 2 reduces muscle AMPK activity and exercise capacity. *J*  
669 *Biol Chem* 285:37198-37209.
- 670 Suzuki M, Suzuki M, Sato K, Dohi S, Sato T, Matsuura A, Hiraide A (2001) Effect of beta-  
671 hydroxybutyrate, a cerebral function improving agent, on cerebral hypoxia, anoxia and  
672 ischemia in mice and rats. *Jpn J Pharmacol* 87:143-150.

- 673 Swick LL, Kazgan N, Onyenwoke RU, Brenman JE (2013) Isolation of AMP-activated protein  
674 kinase (AMPK) alleles required for neuronal maintenance in *Drosophila melanogaster*.  
675 Biol Open 2:1321-1323.
- 676 Turnley AM, Stapleton D, Mann RJ, Witters LA, Kemp BE, Bartlett PF (1999) Cellular  
677 distribution and developmental expression of AMP-activated protein kinase isoforms in  
678 mouse central nervous system. J Neurochem 72:1707-1716.
- 679 Ulgherait M, Rana A, Rera M, Graniel J, Walker DW (2014) AMPK modulates tissue and  
680 organismal aging in a non-cell-autonomous manner. Cell Rep 8:1767-1780.
- 681 Vigne P, Tauc M, Frelin C (2009) Strong dietary restrictions protect *Drosophila* against  
682 anoxia/reoxygenation injuries. PLoS One 4:e5422.
- 683 Volkenhoff A, Weiler A, Letzel M, Stehling M, Klambt C, Schirmeier S (2015) Glial glycolysis  
684 is essential for neuronal survival in *Drosophila*. Cell Metab 22:437-447.
- 685 Walsh ME, Shi Y, Van Remmen H (2014) The effects of dietary restriction on oxidative stress in  
686 rodents. Free Radic Biol Med 66:88-99.
- 687 Xiao C, Robertson RM (2015) Locomotion induced by spatial restriction in adult *Drosophila*.  
688 Plos One 10:e0135825
- 689 Xiao C, Robertson RM (2016) Timing of locomotor recovery from anoxia modulated by the  
690 *white* gene in *Drosophila*. Genetics 203:787-797.
- 691 Zhu CD, Wang ZH, Yan B (2013) Strategies for hypoxia adaptation in fish species: a review. J  
692 Comp Physiol B 183:1005-1013.
- 693

694 **Supplementary Information**

695

696 **Table 1S. Summary of locomotor parameters for all tests.** Due to the exclusion criteria  
 697 following anoxia, the sample size for TR is smaller in certain cases. Statistical comparisons were  
 698 made between their respective controls (as outlined in previous figures).  $p < 0.10$  (‡),  $p < 0.05$   
 699 (\*),  $p < 0.01$  (\*\*),  $p < 0.001$  (\*\*\*)). Details of statistical tests performed are included in the  
 700 Results section.  
 701

|              | Treatment            | n  | Pre-anoxia Period |                  | Anoxia              | Post-anoxia Period   |        |
|--------------|----------------------|----|-------------------|------------------|---------------------|----------------------|--------|
|              |                      |    | Path Length (cm)  | Time at Rest (%) | Time to Succumb (s) | Time to Recovery (s) | n (TR) |
| Starvation   | Starvation (control) | 32 | 215.3 ± 6.5       | 8.7 ± 2.1        | 10.5 ± 0.4          | 874.9 ± 82.0         | 25     |
|              | Starvation           | 32 | 235.2 ± 5.3 *     | 4.3 ± 0.4 *      | 10.2 ± 0.4          | 631.6 ± 36.2 *       | 32     |
| Pharmacology | Metformin (control)  | 16 | 216.8 ± 6.5       | 12.0 ± 1.9       | 10.5 ± 0.4          | 1178.8 ± 151.3       | 16     |
|              | Metformin            | 16 | 252.0 ± 8.2 **    | 7.3 ± 0.8 *      | 10.3 ± 0.5          | 823.2 ± 69.8 †       | 16     |
|              | AICAR (control)      | 32 | 221.3 ± 4.0       | 7.7 ± 0.8        | 8.4 ± 0.1           | 855.7 ± 49.2         | 32     |
|              | AICAR                | 32 | 235.5 ± 5.5 *     | 6.7 ± 0.6        | 8.3 ± 0.1           | 710.2 ± 43.3 *       | 32     |

| Driver            | Genotype               | n  | Path Length (cm) | Time at Rest (%) | Time to Succumb (s) | Time to Recovery (s) | n (TR) |
|-------------------|------------------------|----|------------------|------------------|---------------------|----------------------|--------|
| Pan-neural        | 8765/+                 | 24 | 219.4 ± 10.6     | 10.1 ± 2.4       | 8.0 ± 0.1           | 864.8 ± 88.2         | 24     |
|                   | 8765/ UAS-Cherry-AMPKα | 24 | 208.8 ± 7.2      | 6.5 ± 0.7        | 8.3 ± 0.2           | 1030.7 ± 146.0       | 24     |
|                   | 8765/UAS-AMPK-RNAi     | 15 | 203.3 ± 8.8      | 6.1 ± 1.5        | 8.3 ± 0.3           | 717.2 ± 55.9         | 15     |
| Pan-glial         | 7415/+                 | 24 | 240.5 ± 8.0      | 7.90 ± 1.2       | 8.1 ± 0.1           | 770.1 ± 108.7        | 24     |
|                   | 7415/UAS-Cherry-AMPKα  | 24 | 227.7 ± 9.4      | 8.5 ± 0.9        | 7.8 ± 0.09          | 634.3 ± 77.6 *       | 24     |
| Upstream Sequence | UAS-Cherry-AMPKα/+     | 24 | 250.1 ± 7.2      | 4.6 ± 0.5        | 8.8 ± 0.4           | 703.1 ± 43.7         | 24     |
|                   | UAS-AMPKα-RNAi/+       | 23 | 274.3 ± 7.8      | 5.9 ± 1.3        | 8.2 ± 0.1           | 994.9 ± 78.2         | 23     |

| Glial Class Driver      | Genotype               | n                | Path Length (cm) | Time at Rest (%) | Time to Succumb (s) | Time to Recovery (s) | n (TR) |
|-------------------------|------------------------|------------------|------------------|------------------|---------------------|----------------------|--------|
| Subperineural           | NP2276/+               | 32               | 255.7 ± 12.7     | 5.4 ± 0.5        | 9.1 ± 0.1           | 906.5 ± 104.1        | 32     |
|                         | NP2276/UAS-AMPKα-RNAi  | 28               | 183.6 ± 13.5 *   | 8.1 ± 2.0        | 8.6 ± 0.5           | 837.1 ± 88.6         | 26     |
| Astrocyte               | NP1243/+               | 48               | 158.2 ± 9.2      | 13.3 ± 1.3       | 8.5 ± 0.4           | 929.3 ± 62.1         | 47     |
|                         | NP1243/UAS-AMPKα-RNAi  | 47               | 151.3 ± 9.8      | 8.5 ± 0.6        | 8.3 ± 0.3           | 813.5 ± 72.6         | 45     |
| Ensheathing             | NP6520/+               | 64               | 214.3 ± 10.7     | 6.1 ± 0.5        | 8.5 ± 0.2           | 548.8 ± 25.6         | 64     |
|                         | NP6520/UAS-AMPKα-RNAi  | 63               | 164.7 ± 8.6 ***  | 6.2 ± 0.6        | 7.6 ± 0.3 *         | 419.0 ± 19.7 *       | 63     |
|                         | MZ0709/+               | 64               | 204.7 ± 10.4     | 9.3 ± 0.8        | 8.9 ± 0.2           | 683.0 ± 40.7         | 64     |
|                         | MZ0709/UAS-AMPKα-RNAi  | 66               | 157.6 ± 7.3 *    | 5.8 ± 0.5        | 8.2 ± 0.3           | 503.2 ± 13.2         | 66     |
|                         | Alrm II/+              | 56               | 218.6 ± 12.8     | 4.0 ± 0.4        | 9.2 ± 0.2           | 744.0 ± 47.3         | 56     |
|                         | Alrm II/UAS-AMPKα-RNAi | 51               | 175.7 ± 10.2 *** | 5.1 ± 0.6        | 8.0 ± 0.3           | 808.2 ± 83.8         | 47     |
|                         | Alrm III/+             | 63               | 191.9 ± 10.9     | 7.0 ± 0.9        | 9.0 ± 0.1           | 849.6 ± 57.3         | 58     |
| Alrm III/UAS-AMPKα-RNAi | 48                     | 152.2 ± 13.2 *** | 11.5 ± 1.7 *     | 8.2 ± 0.3        | 641.8 ± 49.5        | 48                   |        |
| Upstream Sequence       | UAS-AMPKα-RNAi/+       | 111              | 201.4 ± 8.1      | 5.5 ± 0.5        | 8.6 ± 0.2           | 695.3 ± 49.7         | 109    |

| GeneSwitch Lines                        | Genotype (Driver/UAS-AMPKα-RNAi) & Treatment | n  | Path Length (cm) | Time at Rest (%) | Time to Succumb (s) | Time to Recovery (s) | n (TR) |
|-----------------------------------------|----------------------------------------------|----|------------------|------------------|---------------------|----------------------|--------|
| Fat body, oenocytes, and tracheal cells | GSG3448 (control)                            | 32 | 174.2 ± 4.4      | 6.2 ± 0.5        | 7.5 ± 0.2           | 796.9 ± 71.4         | 29     |
|                                         | GSG3448 (starved on agar)                    | 31 | 173.8 ± 4.1      | 5.1 ± 0.6 †      | 7.7 ± 0.2           | 639.2 ± 43.6 *       | 31     |
|                                         | GSG3448 (starved on agar with RU486)         | 26 | 175.5 ± 5.8      | 6.6 ± 0.7 †      | 7.8 ± 0.2           | 836.3 ± 80.2 †       | 25     |
| Oenocytes                               | GSGB9-1 (control)                            | 13 | 121.5 ± 8.9      | 15.0 ± 2.0       | 6.3 ± 0.8           | 1180.1 ± 144.6       | 10     |
|                                         | GSGB9-1 (starved on agar)                    | 14 | 118.2 ± 5.8 *    | 10.2 ± 1.1 *     | 6.6 ± 0.9           | 1017.9 ± 85.1        | 14     |
|                                         | GSGB9-1 (starved on agar with RU486)         | 22 | 131.0 ± 5.2 †    | 9.6 ± 1.2        | 7.6 ± 0.4           | 994.9 ± 88.9         | 22     |
| Fat body                                | GSG10751 (control)                           | 14 | 144.7 ± 7.4      | 11.2 ± 3.5       | 8.6 ± 0.2           | 1153.5 ± 158.8       | 13     |
|                                         | GSG10751 (starved on agar)                   | 20 | 124.3 ± 5.2      | 14.3 ± 2.0 *     | 7.5 ± 0.6           | 933.0 ± 82.4         | 20     |
|                                         | GSG10751 (starved on agar with RU486)        | 16 | 109.3 ± 6.4 †    | 20.2 ± 3.7       | 6.5 ± 0.5 *         | 1102.5 ± 155.3       | 15     |

| GeneSwitch Lines                        | Genotype (Driver/UAS-AMPKα-RNAi) & Treatment | n  | Path Length (cm) | Time at Rest (%) | Time to Succumb (s) | Time to Recovery (s) | n (TR) |
|-----------------------------------------|----------------------------------------------|----|------------------|------------------|---------------------|----------------------|--------|
| Fat body, oenocytes, and tracheal cells | GSG3448 (control)                            | 36 | 160.6 ± 3.7      | 8.3 ± 0.7        | 7.2 ± 0.3           | 784.5 ± 68.7         | 35     |
|                                         | GSG3448 (fed RU486 2 days)                   | 19 | 165.2 ± 5.7      | 5.6 ± 0.7        | 8.0 ± 0.4           | 960.4 ± 139.6        | 18     |
|                                         | GSG3448 (fed RU486 4 days)                   | 30 | 153.6 ± 5.3 †    | 8.4 ± 1.6        | 6.7 ± 0.3 †         | 857.0 ± 78.8         | 29     |
| Oenocytes                               | GSGB9-1 (control)                            | 52 | 159.6 ± 3.8      | 8.3 ± 1.1        | 7.4 ± 0.2           | 942.0 ± 106.2        | 46     |
|                                         | GSGB9-1 (fed RU486 2 days)                   | 46 | 160.7 ± 3.5      | 5.8 ± 0.5 *      | 7.5 ± 0.1           | 993.9 ± 106.0        | 44     |
|                                         | GSGB9-1 (fed RU486 4 days)                   | 59 | 161.7 ± 4.3      | 7.1 ± 0.9        | 7.4 ± 0.2           | 1319.7 ± 124.7 †     | 50     |
| Fat body                                | GSG10751 (control)                           | 38 | 165.6 ± 4.1      | 6.6 ± 0.5        | 7.8 ± 0.2           | 736.2 ± 64.3         | 36     |
|                                         | GSG10751 (fed RU486 2 days)                  | 30 | 183.2 ± 6.9 †    | 5.4 ± 0.5        | 7.8 ± 0.4           | 605.1 ± 57.5 †       | 30     |
|                                         | GSG10751 (fed RU486 4 days)                  | 40 | 171.8 ± 4.3 †    | 6.4 ± 0.6 †      | 8.0 ± 0.1           | 783.2 ± 63.5         | 39     |

702

703



704 **Video 1S. Locomotor activity before, during and after anoxia in fed and starved adult flies.**

705 The video shows four columns of eight locomotor assay chambers (1.27 cm diameter) each  
706 containing a single fly. The first two columns contain flies that have been fed (Control); the  
707 second two columns contain flies that have been maintained without food, but with water, for 24  
708 hours (Starved). The first 30 s of the video shows 5 minutes of activity with playback at 10x the  
709 acquisition rate. The next 30 s is played at normal speed for the duration of the nitrogen  
710 application. Note the animals entering a coma after 10 – 15 s of anoxia. The final 3 mins shows  
711 30 minutes of playback at 10x speed to show post-anoxic recovery of locomotor function. Note  
712 that starved flies are more active during the baseline activity and recover from anoxia faster than  
713 control flies.

714
